# Supplementary material for: Processed Food as a Risk Factor for the Development and Perpetuation of Crohn’s Disease—The ENIGMA Study
Source: MDPI journal article supplement (doi:10.3390/nu14173627), 2022-09-02
Supplement: s1 [file s1]

**Food as a Risk Factor for the Development and  
Perpetuation of Crohn's Disease.  
The ENIGMA Study**

**Supplementary Materials**

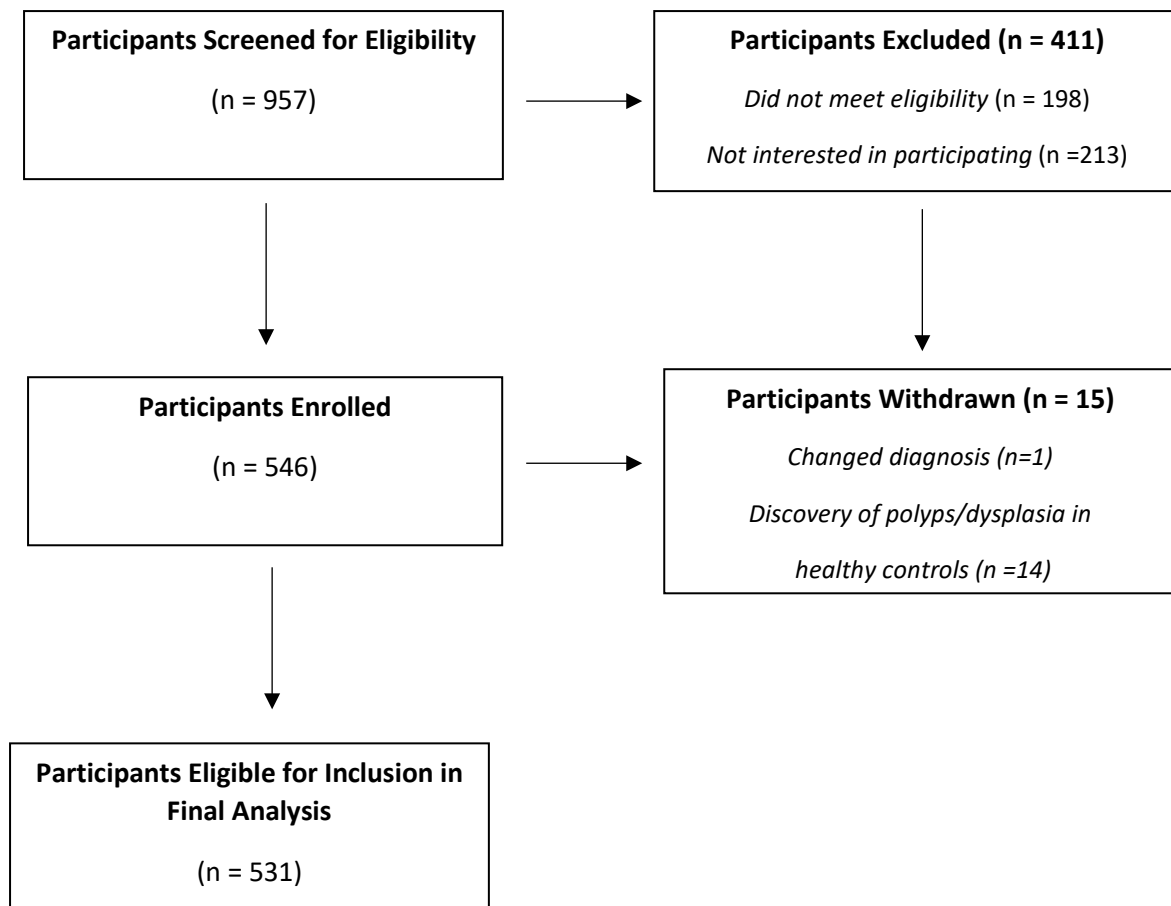

**Supplementary Figure S1: Participant Flowchart**

**Supplementary Table S1.** Summary of Group Comparisons in The ENIGMA Study

| <b>Regional comparisons</b>                 |    |                                                                |
|---------------------------------------------|----|----------------------------------------------------------------|
| All Australia                               | VS | All Hong Kong                                                  |
| All Australia                               | VS | All Mainland China                                             |
| All Hong Kong                               | VS | All Mainland China                                             |
| <b>Regional Crohn's disease comparisons</b> |    |                                                                |
| Australia Crohn's disease cases             | VS | Hong Kong Crohn's disease cases                                |
| Australia Crohn's disease cases             | VS | Hong Kong Crohn's disease cases                                |
| Hong Kong Crohn's disease cases             | VS | Mainland China Crohn's disease cases                           |
| <b>Participant type comparisons</b>         |    |                                                                |
| Australia Crohn's disease cases             | VS | Australia non-Crohn's disease controls (all controls)          |
|                                             |    | Australia first degree relatives (paired and unpaired)         |
|                                             |    | Australia healthy household members (paired and unpaired)      |
|                                             |    | Australia healthy unrelated controls                           |
| Hong Kong Crohn's disease cases             | VS | Hong Kong non-Crohn's disease controls (all controls)          |
|                                             |    | Hong Kong first degree relatives (paired and unpaired)         |
|                                             |    | Hong Kong household members (paired and unpaired)              |
|                                             |    | Hong Kong healthy unrelated controls                           |
| Mainland China Crohn's disease cases        | VS | Mainland China non-Crohn's disease controls (all controls)     |
|                                             |    | Mainland China first degree relatives (paired and unpaired)    |
|                                             |    | Mainland China healthy household members (paired and unpaired) |
|                                             |    | Mainland China healthy unrelated controls                      |

**Supplementary Table S2. Definitions and Examples of Processed Foods**

| <b>Food</b>                | <b>Definition</b>                                                                                                                                                                                                                                                                           |
|----------------------------|---------------------------------------------------------------------------------------------------------------------------------------------------------------------------------------------------------------------------------------------------------------------------------------------|
| Processed Dairy            | Dairy foods, other than plain milk or natural/Greek yoghurt, which have been modified by the addition of flavours, preservatives, sweeteners or thickeners. Includes, flavoured milk, flavoured yogurt, or milk beverages (except whole milk) (E.g. Moo™ chocolate milk, Dare™ iced coffee) |
| Processed meats or seafood | Meat, chicken, or seafood products that have been preserved or flavoured using additives. Includes sausages, burgers, deli meats, chicken nuggets, chicken schnitzel, fish fingers, crab cakes                                                                                              |
| Processed grains           | Highly refined grain foods that have been preserved, flavoured or texture modified with the addition of dietary additives. Includes supermarket bread, crackers, store-bought pasta, instant noodles                                                                                        |
| Processed fruits           | Fruits that have been preserved or sweetened with dietary additives, includes frozen, canned, pickled, dried fruits                                                                                                                                                                         |
| Processed vegetables       | Vegetables that have been preserved or sweetened with dietary additives, includes. frozen, canned, pickled vegetables                                                                                                                                                                       |
| Fast food                  | Over the counter, immediately cooked, ultra-processed foods purchased at chain restaurants, such as McDonald's, Hungry Jacks, KFC, and Pizza Hut                                                                                                                                            |
| Soft drink                 | Sugar-sweetened, additive-containing beverages, includes Coke™, Sprite™, Gatorade™                                                                                                                                                                                                          |
| Processed snacks           | Packaged, energy-dense, nutrient-poor foods, typically consumed between meals, that have been modified with dietary additives. Includes crackers, sweets, biscuits, muesli bars                                                                                                             |

| Supplementary Table S3. Proportion of Individuals who consumed processed foods on a weekly basis in Early Life |                    |                |                    |                                               |                                                          |                       |                      |                                                   |                                               |                                                             |                      |                      |                                                   |                                             |                                                             |                     |                     |                                                  |                                                |                                                                |                        |                        |                                                     |
|----------------------------------------------------------------------------------------------------------------|--------------------|----------------|--------------------|-----------------------------------------------|----------------------------------------------------------|-----------------------|----------------------|---------------------------------------------------|-----------------------------------------------|-------------------------------------------------------------|----------------------|----------------------|---------------------------------------------------|---------------------------------------------|-------------------------------------------------------------|---------------------|---------------------|--------------------------------------------------|------------------------------------------------|----------------------------------------------------------------|------------------------|------------------------|-----------------------------------------------------|
| Question                                                                                                       | AUS<br>(n=179)     | HK<br>(n= 141) | CHINA<br>(n=190)   | All<br>Crohn's<br>Disease<br>Cases<br>(n=273) | All<br>Non-<br>Crohn's<br>Disease<br>Controls<br>(n=237) | All<br>HHM<br>(n=116) | All<br>FDR<br>(n=81) | All<br>Healthy<br>Unrelated<br>Controls<br>(n=92) | AUS<br>Crohn's<br>Disease<br>Cases<br>(n=100) | AUS<br>All Non-<br>Crohn's<br>Disease<br>Controls<br>(n=79) | AUS<br>HHM<br>(n=49) | AUS<br>FDR<br>(n=27) | AUS<br>Healthy<br>Unrelated<br>Controls<br>(n=20) | HK<br>Crohn's<br>Disease<br>Cases<br>(n=94) | HK<br>All Non-<br>Crohn's<br>Disease<br>Controls<br>(n= 47) | HK<br>HHM<br>(n=39) | HK<br>FDR<br>(n=21) | HK<br>Healthy<br>Unrelated<br>Controls<br>(n=22) | CHINA<br>Crohn's<br>Disease<br>Cases<br>(n=79) | CHINA<br>All Non-<br>Crohn's<br>Disease<br>Controls<br>(n=111) | CHINA<br>HHM<br>(n=28) | CHINA<br>FDR<br>(n=33) | CHINA<br>Healthy<br>Unrelated<br>Controls<br>(n=50) |
| Breastfed vs formula fed                                                                                       | 82.4 <sup>†#</sup> | 51.3           | 94.7 <sup>§</sup>  | 73.3                                          | 81.0 ^                                                   | 81.0                  | 79.0                 | 82.6                                              | 84.0 <sup>†</sup>                             | 80.5                                                        | 81.6                 | 74.1                 | 90.0                                              | 46.8 <sup>§</sup>                           | 57.8                                                        | 66.7                | 64.0                | 40.9                                             | 91.1                                           | 97.3                                                           | 100.0                  | 93.9                   | 98.0                                                |
| Bottled food when weaned                                                                                       | 23.2 <sup>†#</sup> | 10.2           | 5.3                | 14.0                                          | 11.4                                                     | 14.7                  | 11.0                 | 7.6                                               | 23.2                                          | 23.2                                                        | 22.4                 | 25.0                 | 15.0                                              | 12.9 <sup>§</sup>                           | 6.3                                                         | 7.7                 | 4.0                 | 4.5                                              | 3.8                                            | 6.3                                                            | 10.7                   | 3.0                    | 6.0                                                 |
| Foods from convenience stores                                                                                  | 7.7                | 5.1            | 0.5 <sup>§</sup>   | 5.9                                           | 2.8                                                      | 3.4                   | 3.7                  | 1.1                                               | 8.0 <sup>#</sup>                              | 7.2                                                         | 6.0                  | 7.1                  | 5.0                                               | 7.5                                         | 1.6                                                         | 2.6                 | 4.0                 | 0.0                                              | 1.3                                            | 0.0                                                            | 0.0                    | 0.0                    | 0.0                                                 |
| Ate homegrown foods 4-12 months                                                                                | 30.6 <sup>†#</sup> | 8.2            | 64.2 <sup>§</sup>  | 29.3+                                         | 40.9^                                                    | 34.2                  | 42.72                | 47.83                                             | 31.0 <sup>†#</sup>                            | 30.1                                                        | 32.0                 | 32.1                 | 30.0                                              | 5.3 <sup>§</sup>                            | 12.5                                                        | 12.8                | 12.0                | 9.1                                              | 55.7                                           | 70.3^                                                          | 67.9                   | 69.7                   | 72.0 <sup>3</sup>                                   |
| Ate homegrown foods 1-5 years                                                                                  | 34.4 <sup>†#</sup> | 9.5            | 66.3 <sup>§</sup>  | 30.8+                                         | 44.0^                                                    | 36.8                  | 43.92                | 53.33                                             | 32.0 <sup>†#</sup>                            | 37.3                                                        | 36.0                 | 35.7                 | 50.0                                              | 6.4 <sup>§</sup>                            | 14.1                                                        | 12.8                | 8.0                 | 13.6                                             | 58.2                                           | 72.0^                                                          | 71.4                   | 72.7                   | 72.0                                                |
| Ate homegrown foods 5-10 years                                                                                 | 35.5 <sup>†#</sup> | 9.5            | 62.6 <sup>§</sup>  | 31.1+                                         | 41.6^                                                    | 35.9                  | 40.2                 | 50.03                                             | 34.0 <sup>†#</sup>                            | 37.3                                                        | 36.0                 | 32.1                 | 50.0                                              | 7.4 <sup>§</sup>                            | 12.5                                                        | 10.3                | 8.0                 | 13.6                                             | 55.7                                           | 67.6                                                           | 71.4                   | 66.7                   | 66.0                                                |
| Ate homegrown foods 10-18 years                                                                                | 34.4 <sup>†#</sup> | 8.2            | 54.7 <sup>§</sup>  | 27.5+                                         | 38.5^                                                    | 35.0                  | 39.02                | 42.43                                             | 30.0 <sup>†#</sup>                            | 39.8                                                        | 34.0                 | 42.9                 | 50.0                                              | 7.4 <sup>§</sup>                            | 9.4                                                         | 10.3                | 8.0                 | 4.5                                              | 48.1                                           | 59.5                                                           | 71.4 <sup>1</sup>      | 54.5                   | 56.0                                                |
| Ate processed dairy 4-12 months                                                                                | 9.9 <sup>†#</sup>  | 18.4           | 3.2 <sup>§</sup>   | 11.0+                                         | 8.6                                                      | 13.7                  | 2.42                 | 7.6                                               | 6.1+ <sup>†</sup>                             | 14.5                                                        | 16.0 <sup>1</sup>    | 3.6                  | 20.0                                              | 22.3 <sup>§</sup>                           | 12.5                                                        | 15.4                | 8.0                 | 9.1                                              | 3.8                                            | 2.7                                                            | 7.1                    | 0.0                    | 2.0                                                 |
| Ate processed dairy 1-5 years                                                                                  | 23.5 <sup>†#</sup> | 36.1           | 5.8 <sup>§</sup>   | 25.3+                                         | 16.6^                                                    | 23.9                  | 11.02                | 12.13                                             | 22.0 <sup>†#</sup>                            | 25.3                                                        | 24.0                 | 21.4                 | 30.0                                              | 41.5+ <sup>§</sup>                          | 28.1                                                        | 35.9                | 20.0                | 18.2                                             | 10.1                                           | 2.7^                                                           | 7.1                    | 0.0                    | 2.0                                                 |
| Ate processed dairy 5-10 years                                                                                 | 41.5               | 49.4           | 13.2 <sup>§</sup>  | 39.2+                                         | 29.2^                                                    | 37.6                  | 28.0                 | 19.63                                             | 40.0 <sup>#</sup>                             | 43.4                                                        | 36.0                 | 39.3                 | 55.0                                              | 52.1+ <sup>§</sup>                          | 45.3                                                        | 59.0                | 48.0                | 22.7 <sup>3</sup>                                | 22.8+                                          | 6.3^                                                           | 17.9                   | 6.1 <sup>2</sup>       | 4.0 <sup>3</sup>                                    |
| Ate processed dairy 10-18 years                                                                                | 47.8 <sup>†#</sup> | 71.5           | 23.7 <sup>§</sup>  | 51.8+                                         | 43.6                                                     | 51.3                  | 41.5                 | 35.93                                             | 45.5 <sup>†</sup>                             | 50.6                                                        | 46.0                 | 46.4                 | 65.0                                              | 75.5 <sup>§</sup>                           | 65.6                                                        | 82.1                | 76.0                | 40.9 <sup>3</sup>                                | 31.6                                           | 18.0^                                                          | 10.7                   | 12.1 <sup>2</sup>      | 22.0                                                |
| At processed meat 4-12 months                                                                                  | 10.9               | 6.3            | 2.1                | 8.1                                           | 4.1^                                                     | 6.0                   | 2.4                  | 3.3                                               | 11.0 <sup>†#</sup>                            | 10.8                                                        | 10.0                 | 7.1                  | 10.0                                              | 9.6                                         | 1.6                                                         | 0.0                 | 0.0                 | 4.5                                              | 2.5                                            | 1.8                                                            | -                      | 0.0                    | 0.0                                                 |
| At processed meat 1-5 years                                                                                    | 48.1 <sup>†#</sup> | 36.7           | 4.7 <sup>§</sup>   | 33.3+                                         | 24.7^                                                    | 34.2                  | 19.52                | 17.43                                             | 48.0 <sup>#</sup>                             | 48.2                                                        | 46.0                 | 42.9                 | 45.0                                              | 38.3 <sup>§</sup>                           | 34.4                                                        | 38.5                | 20.0                | 31.8                                             | 8.9                                            | 1.8^                                                           | 7.1                    | 0.0                    | 0.0 <sup>3</sup>                                    |
| At processed meat 5-10 years                                                                                   | 74.3               | 65.8           | 11.6 <sup>§</sup>  | 56.4+                                         | 44.3^                                                    | 53.8                  | 41.52                | 34.83                                             | 77.0 <sup>#</sup>                             | 71.1                                                        | 70.0                 | 71.4                 | 70.0                                              | 68.1 <sup>§</sup>                           | 62.5                                                        | 64.1                | 56.0                | 63.6                                             | 16.5                                           | 8.1                                                            | 10.7                   | 6.1                    | 8.0                                                 |
| At processed meat 10-18 years                                                                                  | 82.5               | 83.5           | 26.3 <sup>§</sup>  | 70.3+                                         | 58.1^                                                    | 67.5                  | 54.92                | 48.93                                             | 83.0 <sup>#</sup>                             | 81.9                                                        | 80.0                 | 78.6                 | 85.0                                              | 83.0 <sup>§</sup>                           | 84.4                                                        | 89.7                | 80.0                | 81.8                                             | 39.2+                                          | 17.1^                                                          | 14.3 <sup>1</sup>      | 15.2 <sup>2</sup>      | 20.0 <sup>3</sup>                                   |
| Ate processed grains 4-12 months                                                                               | 25.1 <sup>†#</sup> | 10.8           | 0.5 <sup>§</sup>   | 13.9                                          | 9.7                                                      | 11.1                  | 9.8                  | 7.7                                               | 26.0 <sup>†#</sup>                            | 24.1                                                        | 18.0                 | 25.0                 | 25.0                                              | 12.8 <sup>§</sup>                           | 7.8                                                         | 7.7                 | 8.0                 | 9.1                                              | 0.0                                            | 0.9                                                            | 3.6                    | 0.0                    | 0.0                                                 |
| Ate processed grains 1-5 years                                                                                 | 68.9 <sup>#</sup>  | 57.0           | 5.8 <sup>§</sup>   | 49.8+                                         | 36.8^                                                    | 48.7                  | 32.92                | 25.03                                             | 71.0 <sup>†</sup>                             | 66.3                                                        | 64.0                 | 60.7                 | 65.0                                              | 59.6 <sup>§</sup>                           | 53.1                                                        | 59.0                | 52.0                | 45.5                                             | 11.4+                                          | 1.8^                                                           | 7.1                    | 0.0 <sup>2</sup>       | 0.03                                                |
| Ate processed grains 5-10 years                                                                                | 82.0               | 79.1           | 14.7 <sup>§</sup>  | 65.2+                                         | 51.9^                                                    | 64.1                  | 50.02                | 38.03                                             | 83.0                                          | 80.7                                                        | 80.0                 | 85.7                 | 75.0                                              | 79.8 <sup>§</sup>                           | 78.1                                                        | 82.1                | 72.0                | 77.3                                             | 25.3+                                          | 7.2^                                                           | 10.7                   | 6.1 <sup>2</sup>       | 6.0                                                 |
| Ate processed grains 10-18 years                                                                               | 89.6               | 93.0           | 28.9 <sup>§</sup>  | 77.7+                                         | 63.2^                                                    | 73.5                  | 62.22                | 51.13                                             | 89.0                                          | 90.4                                                        | 92.0                 | 96.4                 | 80.0                                              | 95.7 <sup>§</sup>                           | 89.1                                                        | 89.7                | 84.0                | 90.9                                             | 41.8+                                          | 19.8^                                                          | 17.9 <sup>1</sup>      | 18.2 <sup>2</sup>      | 22.0 <sup>3</sup>                                   |
| Ate processed fruit 4-12 months                                                                                | 22.0 <sup>†#</sup> | 6.3            | 1.6 <sup>§</sup>   | 12.9+                                         | 6.2^                                                     | 8.5                   | 4.92                 | 4.33                                              | 26.3 <sup>†#</sup>                            | 16.9                                                        | 16.0                 | 14.3                 | 10.0                                              | 8.5 <sup>§</sup>                            | 3.1                                                         | 2.6                 | 0.0                 | 4.5                                              | 1.3                                            | 1.8                                                            | 3.6                    | 0.0                    | 2.03                                                |
| Ate processed fruit 1-5 years                                                                                  | 47.3 <sup>†#</sup> | 19.6           | 6.8 <sup>§</sup>   | 27.6                                          | 21.0                                                     | 26.5                  | 18.3                 | 16.33                                             | 49.5 <sup>†#</sup>                            | 44.6                                                        | 38.0                 | 39.3                 | 50.0                                              | 21.3 <sup>§</sup>                           | 17.2                                                        | 20.5                | 20.0                | 13.6                                             | 7.6                                            | 6.3                                                            | 14.3                   | 9.1                    | 4.03                                                |
| Ate processed fruit 5-10 years                                                                                 | 58.2 <sup>†#</sup> | 38.6           | 11.1 <sup>§</sup>  | 37.9+                                         | 34.7                                                     | 43.6                  | 36.6                 | 21.73                                             | 56.6 <sup>#</sup>                             | 60.2                                                        | 54.0                 | 67.9                 | 60.0                                              | 39.4 <sup>§</sup>                           | 37.5                                                        | 46.2                | 40.0                | 27.3                                             | 12.7                                           | 9.9                                                            | 21.4                   | 0.0                    | 4.03                                                |
| Ate processed fruit 10-18 years                                                                                | 65.7               | 56.3           | 15.9 <sup>§</sup>  | 49.4+                                         | 43.1                                                     | 52.1                  | 39.5                 | 34.83                                             | 64.3 <sup>#</sup>                             | 67.5                                                        | 62.0                 | 67.9                 | 70.0                                              | 57.4 <sup>§</sup>                           | 54.7                                                        | 64.1                | 60.0                | 45.5                                             | 21.5                                           | 11.8                                                           | 17.9                   | 0.0 <sup>2</sup>       | 16.0 <sup>3</sup>                                   |
| Ate processed veg 4-12 months                                                                                  | 19.7 <sup>†#</sup> | 3.8            | 71.1 <sup>§</sup>  | 22.3+                                         | 39.9^                                                    | 29.9                  | 40.22                | 52.23                                             | 14.0 <sup>#</sup>                             | 26.5^                                                       | 24.0                 | 17.9                 | 25.0                                              | 5.3 <sup>§</sup>                            | 1.6                                                         | 0.0                 | 0.0                 | 4.5                                              | 53.2+                                          | 83.6^                                                          | 82.1 <sup>1</sup>      | 84.8 <sup>2</sup>      | 84.0                                                |
| Ate processed veg 1-5 years                                                                                    | 43.7 <sup>†#</sup> | 20.3           | 87.9 <sup>§</sup>  | 41.4+                                         | 53.6^                                                    | 47.9                  | 52.4                 | 62.03                                             | 43.0 <sup>#</sup>                             | 44.6                                                        | 40.0                 | 32.1                 | 50.0                                              | 21.3 <sup>§</sup>                           | 18.8                                                        | 23.1                | 20.0                | 13.6                                             | 63.3+                                          | 91.0^                                                          | 96.4 <sup>1</sup>      | 97.0 <sup>2</sup>      | 88.0                                                |
| Ate processed veg 5-10 years                                                                                   | 56.8 <sup>†#</sup> | 42.4           | 91.6 <sup>§</sup>  | 58.6+                                         | 64.9                                                     | 59.0                  | 62.2                 | 75.03                                             | 58.0 <sup>#</sup>                             | 55.4                                                        | 52.0                 | 42.9                 | 60.0                                              | 44.7 <sup>§</sup>                           | 39.1                                                        | 41.0                | 36.0                | 40.9                                             | 75.9+                                          | 96.4^                                                          | 96.4 <sup>1</sup>      | 100.0 <sup>2</sup>     | 96.0                                                |
| Ate processed veg 10-18 years                                                                                  | 63.9               | 58.9           | 100.0 <sup>§</sup> | 68.9                                          | 73.5                                                     | 70.9                  | 69.5                 | 80.43                                             | 66.0 <sup>#</sup>                             | 61.4                                                        | 60.0                 | 42.9                 | 65.0                                              | 57.4 <sup>§</sup>                           | 60.9                                                        | 66.7                | 64.0                | 59.1                                             | 86.1                                           | 95.5^                                                          | 86.1                   | 93.9                   | 96.0                                                |
| Ate fast food 4-12 months                                                                                      | 3.3                | 3.2            | 0.0 <sup>§</sup>   | 3.7+                                          | 0.3^                                                     | 0.9                   | 0.0                  | 0.0                                               | 5.0 <sup>#</sup>                              | 1.2                                                         | 2.0                  | 0.0                  | 0.0                                               | 5.3 <sup>§</sup>                            | 0.0                                                         | 0.0                 | 0.0                 | 0.0                                              | 0.0                                            | 0.0                                                            | 0.0                    | 0.0                    | 0.0                                                 |
| Ate fast food 1-5 years                                                                                        | 14.8 <sup>†#</sup> | 24.1           | 1.6 <sup>§</sup>   | 17.2+                                         | 8.6^                                                     | 12.0                  | 8.5                  | 4.33                                              | 16.0 <sup>#</sup>                             | 13.3                                                        | 12.0                 | 10.7                 | 10.0                                              | 29.8 <sup>§</sup>                           | 15.6                                                        | 23.5                | 16.0                | 9.1 <sup>C</sup>                                 | 3.8                                            | 0.0^                                                           | 0.0                    | 0.0                    | 0.0                                                 |
| Ate fast food 5-10 years                                                                                       | 32.2 <sup>†#</sup> | 48.7           | 6.8 <sup>§</sup>   | 35.9+                                         | 20.3^                                                    | 24.8 <sup>1</sup>     | 22.02                | 13.03                                             | 38.0 <sup>#</sup>                             | 25.3                                                        | 16.0 <sup>A</sup>    | 25.0                 | 30.0                                              | 55.3 <sup>§*</sup>                          | 39.1                                                        | 52.9                | 44.0                | 22.7 <sup>C3</sup>                               | 10.1                                           | 4.5                                                            | 7.1                    | 6.1                    | 2.0 <sup>3</sup>                                    |
| Ate fast food 10-18 years                                                                                      | 54.6 <sup>†#</sup> | 79.7           | 13.2 <sup>§</sup>  | 55.7+                                         | 40.9^                                                    | 47.9                  | 42.7                 | 30.43                                             | 56.0 <sup>#</sup>                             | 53.0                                                        | 48.0                 | 53.6                 | 45.0                                              | 85.1 <sup>§</sup>                           | 71.9^                                                       | 62.5                | 80.0                | 68.2                                             | 20.3                                           | 8.^                                                            | 10.7                   | 6.1                    | 8.0 <sup>3</sup>                                    |
| Drank soft drinks 4-12 months                                                                                  | 3.3                | 5.7            | 0.0 <sup>§</sup>   | 4.4                                           | 1.0^                                                     | 0.9                   | 1.2                  | 1.1                                               | 9.0                                           | 15.7                                                        | 12.0                 | 7.1                  | 25.0                                              | 12.8 <sup>§</sup>                           | 1.6                                                         | 0.0                 | 0.0                 | 4.5                                              | 0.0                                            | 0.0                                                            | 0.0                    | 0.0                    | 0.0                                                 |
| Drank soft drinks 1-5 years                                                                                    | 17.5 <sup>†#</sup> | 33.9           | 2.6 <sup>§</sup>   | 22.0                                          | 16.6                                                     | 21.4                  | 15.9                 | 11.03                                             | 50.0 <sup>†#</sup>                            | 49.4                                                        | 52.0                 | 46.4                 | 40.0                                              | 59.6 <sup>§</sup>                           | 50.0                                                        | 59.0                | 56.0                | 36.4                                             | 3.8                                            | 1.8                                                            | 3.6                    | 0.0                    | 2.0                                                 |
| Drank soft drinks 5-10 years                                                                                   | 45.4 <sup>†#</sup> | 69.0           | 13.7 <sup>§</sup>  | 49.5+                                         | 34.0^                                                    | 43.6                  | 31.72                | 23.93                                             | 75.0 <sup>†#</sup>                            | 72.3                                                        | 70.0                 | 64.3                 | 75.0                                              | 80.9 <sup>§</sup>                           | 68.8                                                        | 76.9                | 72.0                | 59.1                                             | 24.1+                                          | 6.3^                                                           | 10.7                   | 3.0 <sup>2</sup>       | 26.0 <sup>3</sup>                                   |
| Drank soft drinks 10-18 years                                                                                  | 71.0 <sup>†#</sup> | 91.1           | 29.5 <sup>§</sup>  | 68.1+                                         | 60.5                                                     | 71.8                  | 61.0                 | 45.73                                             | 85.0                                          | 86.7                                                        | 86.0                 | 78.6                 | 90.0                                              | 89.4 <sup>§</sup>                           | 87.5                                                        | 87.2                | 84.0                | 90.9                                             | 41.8+                                          | 20.7^                                                          | 21.4                   | 15.2 <sup>2</sup>      | 24.0 <sup>3</sup>                                   |
| Ate processed snacks 4-12 months                                                                               | 12.0               | 8.2            | 3.2                | 8.8                                           | 5.8                                                      | 6.8                   | 3.7                  | 6.5                                               | 4.0                                           | 2.4                                                         | 2.0                  | 3.6                  | 0.0                                               | 8.5 <sup>§</sup>                            | 1.6                                                         | 0.0                 | 0.0                 | 4.5                                              | 3.8                                            | 2.7                                                            | 7.1                    | 3.0                    | 0.0                                                 |
| Ate processed snacks 1-5 years                                                                                 | 49.7 <sup>#</sup>  | 55.7           | 16.8 <sup>§</sup>  | 46.2+                                         | 35.1^                                                    | 45.3                  | 35.4                 | 21.73                                             | 17.0 <sup>#</sup>                             | 18.1                                                        | 16.0                 | 17.9                 | 15.0                                              | 42.6 <sup>§</sup>                           | 35.9                                                        | 41.0                | 40.0                | 27.3                                             | 25.3                                           | 10.8^                                                          | 14.3                   | 12.1                   | 8.0 <sup>3</sup>                                    |
| Ate processed snacks 5-10 years                                                                                | 73.8 <sup>#</sup>  | 75.9           | 26.8 <sup>§</sup>  | 67.8+                                         | 49.5^                                                    | 59.8                  | 47.62                | 38.03                                             | 46.0 <sup>#</sup>                             | 44.6                                                        | 42.0                 | 42.9                 | 40.0                                              | 74.5 <sup>§</sup>                           | 60.9                                                        | 69.2                | 60.0                | 50.0 <sup>C</sup>                                | 43.0+                                          | 15.3^                                                          | 17.9 <sup>1</sup>      | 15.2 <sup>2</sup>      | 14.0 <sup>3</sup>                                   |

| Ate processed snacks 10-18 years                                                                                                                                                                                                  | 85.8 <sup>#</sup> | 88.6 | 43.7 <sup>§</sup> | 79.9 <sup>+</sup> | 65.3 <sup>^</sup> | 75.2 | 59.82 | 57.63 | 65.0 <sup>#</sup> | 78.3 <sup>^</sup> | 86.0 | 89.3 <sup>2</sup> | 55.0 | 93.6 <sup>§</sup> | 87.5 | 89.7 | 92.0 | 86.4 | 62.0 <sup>+</sup> | 30.6 <sup>^</sup> | 39.3 <sup>1</sup> | 24.2 <sup>2</sup> | 30.0 <sup>3</sup> |
|-----------------------------------------------------------------------------------------------------------------------------------------------------------------------------------------------------------------------------------|-------------------|------|-------------------|-------------------|-------------------|------|-------|-------|-------------------|-------------------|------|-------------------|------|-------------------|------|------|------|------|-------------------|-------------------|-------------------|-------------------|-------------------|
| Difference across regions OR difference across Crohn's Disease participants across regions:                                                                                                                                       |                   |      |                   |                   |                   |      |       |       |                   |                   |      |                   |      |                   |      |      |      |      |                   |                   |                   |                   |                   |
| † Australia different to Hong Kong                                                                                                                                                                                                |                   |      |                   |                   |                   |      |       |       |                   |                   |      |                   |      |                   |      |      |      |      |                   |                   |                   |                   |                   |
| # Australia different to China                                                                                                                                                                                                    |                   |      |                   |                   |                   |      |       |       |                   |                   |      |                   |      |                   |      |      |      |      |                   |                   |                   |                   |                   |
| § Hong Kong different to China                                                                                                                                                                                                    |                   |      |                   |                   |                   |      |       |       |                   |                   |      |                   |      |                   |      |      |      |      |                   |                   |                   |                   |                   |
| ^ Crohn's Disease participants different to non- Crohn's Disease participants combined                                                                                                                                            |                   |      |                   |                   |                   |      |       |       |                   |                   |      |                   |      |                   |      |      |      |      |                   |                   |                   |                   |                   |
| + Difference across participant types                                                                                                                                                                                             |                   |      |                   |                   |                   |      |       |       |                   |                   |      |                   |      |                   |      |      |      |      |                   |                   |                   |                   |                   |
| Post-Hoc (where +, is significant): 1 – Crohn's Disease different to Household member (unpaired); 2 - Crohn's Disease different to First Degree Relatives (unpaired); 3- Crohn's Disease different to Healthy Controls (unpaired) |                   |      |                   |                   |                   |      |       |       |                   |                   |      |                   |      |                   |      |      |      |      |                   |                   |                   |                   |                   |
| a - Crohn's Disease different to Household member (paired); b - Crohn's Disease different to First Degree Relatives (paired); c- Crohn's Disease different to Healthy Controls (paired)                                           |                   |      |                   |                   |                   |      |       |       |                   |                   |      |                   |      |                   |      |      |      |      |                   |                   |                   |                   |                   |
| <b>AUS – Australia, HK – Hong Kong, HHM – Healthy Household Members, FDR – First Degree Relatives</b>                                                                                                                             |                   |      |                   |                   |                   |      |       |       |                   |                   |      |                   |      |                   |      |      |      |      |                   |                   |                   |                   |                   |
| <b>In Australia 17 FDRs were also analysed as Household members; In Hong Kong 35 FDRs were also analysed as Household members</b>                                                                                                 |                   |      |                   |                   |                   |      |       |       |                   |                   |      |                   |      |                   |      |      |      |      |                   |                   |                   |                   |                   |

**Supplementary Table S4.** Median annual intake of additives calculated based on responses to the survey on intake of processed foods consumed in the past 12 months

| Intake median (mg)                       | Australia (n=180)                | Hong Kong (n= 142) | China (n=190)                    | All Crohn's Disease Cases (n=274) | All Non-Crohn's Disease Controls (n=238) | All Healthy HHM (n=118)          | All FDR (n=81)                   | All Healthy Unrelated Controls (n=91) | AUS Crohn's Disease Cases (n=100)  | AUS All Non-Crohn's Disease Controls (n=62) | AUS HHM (n=50)                   | AUS All FDR (n=28)               | AUS Healthy Unrelated Controls (n=19) | HK Crohn's Disease Cases (n=95)   | HK All Non-Crohn's Disease Controls (n=82) | HK HHM (n=39)                    | HK All FDR (n=21)               | HK Healthy Unrelated Controls (n=22) | CHINA Crohn's Disease Cases (n=79) | CHINA All Non-Crohn's Disease Controls (n=118) | CHINA HHM (n=30)                  | CHINA All FDR (n=31)              | CHINA Healthy Unrelated Controls (n=50) |
|------------------------------------------|----------------------------------|--------------------|----------------------------------|-----------------------------------|------------------------------------------|----------------------------------|----------------------------------|---------------------------------------|------------------------------------|---------------------------------------------|----------------------------------|----------------------------------|---------------------------------------|-----------------------------------|--------------------------------------------|----------------------------------|---------------------------------|--------------------------------------|------------------------------------|------------------------------------------------|-----------------------------------|-----------------------------------|-----------------------------------------|
| <b>Total Additive Intake</b>             | 1.9E+6<br>(1.8E+6)               | 1.1E+6<br>(1.2E6)  | 4.0+E5<br>(4.9E+5)               | 1.2E+6<br>(1.9E+6)                | 8.2E+5^<br>(1.4E+6)                      | 1.0E+6<br>(1.8E+6)               | 7.2E+5 <sup>b2</sup><br>(1.4E+6) | 7.1E+5 <sup>3</sup><br>(9.8+E+5)      | 2.1E+6+ <sup>†‡*</sup><br>(1.3E+6) | 1.7E+6^<br>(2.1E+5)                         | 1.8E+6<br>(3.0E+6)               | 1.5E+6 <sup>2</sup><br>(1.3E+6)  | 1.6E+6<br>(1.2E+6)                    | 1.2E+6<br>(1.3E+6)                | 9.8E+6<br>(1.1E+5)                         | 9.9E+5 <sup>1</sup><br>(1.2E+6)  | 8.7E+5<br>(1.0E+5)              | 1.0E+6<br>(1.1E+5)                   | 4.7E+5+ <sup>§</sup><br>(-8.0E+5)  | 3.7E+5<br>(-3.9E+5)                            | 3.3E+5<br>(-3.9E+5)               | 3.7E+5 <sup>2</sup><br>(-3.5E+5)  | 3.9E+5<br>(-4.9E+5)                     |
| <b>Total Artificial Sweetener Intake</b> | 2.0E+5 <sup>†‡</sup><br>(2.6E+5) | 8.1E+4<br>(1.1E+3) | 2.0E+5 <sup>§</sup><br>(-2.7E+5) | 9.5E+4+<br>(1.8E+5)               | 4.8E+4^<br>(1.4E+5)                      | 7.3E+5<br>(1.9E+5)               | 4.5E+4 <sup>2</sup><br>(1.2E+5)  | 3.6E+4 <sup>3</sup><br>(7.4E+4)       | 2.0E+5 <sup>‡*</sup><br>(2.8E+5)   | 2.0E+5 <sup>**</sup><br>(2.5E+5)            | 2.3E+5<br>(2.5E+5)               | 1.9E+5 <sup>2</sup><br>(2.8E+5)  | 1.3E+5<br>(1.6E+5)                    | 9.6E+4+<br>(1.2E+5)               | 5.2E+4^<br>(9.2E+4)                        | 4.8E+4 <sup>a1</sup><br>(9.2E+4) | 3.1E+4 <sup>b</sup><br>(8.9E+4) | 7.4E+4<br>(2.7E+4)                   | 2.9E+3+<br>(-3.7E+4)               | 1.8E+4<br>(-2.8E+4)                            | 1.4E+4<br>(-2.0E+4)               | 3.0E+4<br>(-3.1E+4)               | 1.6E+4<br>(-2.1E+4)                     |
| <b>Total Emulsifiers Intake</b>          | 1.7E+5 <sup>†‡</sup><br>(1.9E+6) | 1.1E+6<br>(1.1E+6) | 1.7E+6 <sup>§</sup><br>(-1.9E+6) | 1.1E+6+<br>(1.6E+6)               | 7.7E+5^<br>(1.2E+6)                      | 9.2E+5<br>(1.6E+6)               | 6.6E+5 <sup>b2</sup><br>(1.2E+6) | 6.4E+5 <sup>3</sup><br>(8.9E+5)       | 1.9E+6 <sup>†‡*</sup><br>(2.3E+6)  | 1.4E+6^ <sup>^</sup><br>(1.6E+6)            | 1.5E+6<br>(2.1E+6)               | 1.4E+6 <sup>b2</sup><br>(1.3E+6) | 1.4E+6<br>(1.8E+6)                    | 1.1E+4<br>(1.2E+6)                | 9.3E+5<br>(1.1E+6)                         | 9.7E+5<br>(1.5E+6)               | 8.0E+5 <sup>b</sup><br>(1.3E+6) | 9.5E+5<br>(8.5E+4)                   | 4.6E+5+ <sup>§</sup><br>(-7.1E+5)  | 3.6E+5^<br>(-3.7E+5)                           | 3.0E+5 <sup>a</sup><br>(-3.7E+5)  | 3.4E+5 <sup>2</sup><br>(-3.2E+5)  | 3.3E+5<br>(-4.4E+5)                     |
| Aluminosilicates                         | 1.2E+3 <sup>†</sup><br>(4.3E+3)  | 1.5E+3<br>(3.4E+3) | 0.0E+0 <sup>§</sup><br>(4.8)     | 8.3+E3+<br>(3.5E+3)               | 1.4E+5^<br>(1.6E+3)                      | 4.9E+2<br>(2.5E+3)               | 4.8E+1 <sup>b2</sup><br>(7.9E+2) | 1.2E+0 <sup>3</sup><br>(1.2E+3)       | 1.2E+3 <sup>†‡*</sup><br>(4.3E+3)  | 1.2E+3<br>(4.1E+3)                          | 1.2E+3<br>(3.9E+3)               | 7.4E+2 <sup>2</sup><br>(3.0E+3)  | 1.3E+3<br>(8.2E+3)                    | 1.7E+3+<br>(3.5E+3)               | 5.5E+2<br>(3.3E+4)                         | 9.0E+2<br>(3.3E+3)               | 4.4E+2 <sup>b</sup><br>(2.1E+3) | 8.1E+2<br>(3.9E+3)                   | 7.0E-1+ <sup>§</sup><br>(-8.4E+2)  | 0.0E+0<br>(-5.2E4)                             | 0.0E+0 <sup>1</sup><br>(0.0E+0)   | 0.0E+0 <sup>b2</sup><br>(-1.8E+0) | 0.0E+0 <sup>3</sup>                     |
| Aspartame                                | 9.3E+4 <sup>†‡</sup><br>(1.3E+5) | 4.3E+4<br>(6.4E+4) | 1.1E+4 <sup>§</sup><br>(-1.7E+4) | 4.9E+4+<br>(8.2E+4)               | 2.5E+4^<br>(7.4E+4)                      | 3.5E+4*<br>(1.0E+)               | 2.4E+4 <sup>2</sup><br>(5.7E+5)  | 2.1E+4 <sup>3</sup><br>(4.6E+4)       | 9.5E+4 <sup>†‡*</sup><br>(1.4E+5)  | 8.9E+4*<br>(1.3E+5)                         | 1.1E+5<br>(1.4E+5)               | 8.7E+4 <sup>2</sup><br>(1.5E5)   | 6.0E+4<br>(5.4E+4)                    | 5.4E+4+<br>(6.7E+4)               | 2.8E+4^<br>(4.9E+4)                        | 2.9E+4 <sup>a1</sup><br>(4.6E+4) | 1.9E+4<br>(5.2E+4)              | 3.6+4<br>(4.4E+4)                    | 1.1E+4+ <sup>§</sup><br>(-2.2E+4)  | 9.7E+3^<br>(-1.5E+4)                           | 8.0E+3<br>(-1.2E+4)               | 1.6E+4<br>(-1.4E+4)               | 4.9E+5<br>(-1.4E+4)                     |
| Carboxymethyl-cellulose                  | 7.7E+5 <sup>†‡</sup><br>(1.1E+6) | 4.5E+5<br>(6.5E+5) | 2.0E+5 <sup>§</sup><br>(-2.3E+5) | 4.5E+6+<br>(8.2+6)                | 3.0E+5^<br>(5.6E+5)                      | 3.4E+5<br>(8.0E+5)               | 2.3E+5 <sup>b2</sup><br>(5.5E+5) | 2.6E+5 <sup>3</sup><br>(4.6E+5)       | 9.0E+5 <sup>†‡*</sup><br>(1.2E+6)  | 6.6E+5*<br>(9.5E+5)                         | 7.1E+5<br>(1.2E+6)               | 6.1E+5 <sup>2</sup><br>(6.6E+5)  | 6.2E+5<br>(1.1E+6)                    | 5.0E+5<br>(7.0E+5)                | 3.7E+5 <sup>§</sup><br>(7.0E+5)            | 4.0E+5<br>(6.9E+5)               | 3.0E+5 <sup>b</sup><br>(5.4E+5) | 4.1E+5<br>(5.1E+5)                   | 2.2E+5+ <sup>§</sup><br>(-3.4E+5)  | 2.0E+5<br>(-1.8E+5)                            | 1.6E+5 <sup>a</sup><br>(-1.8E+5)  | 1.9E+5<br>(-1.4E+5)               | 2.0E+5<br>(-2.3E+5)                     |
| Carrageenan                              | 5.0E+5 <sup>†‡</sup><br>(6.1E+5) | 3.1E+5<br>(4.3E+5) | 9.7E+4 <sup>§</sup><br>(-1.6E+5) | 3.0E+5+<br>(5.0E+5)               | 2.0E+5^<br>(3.8E+5)                      | 2.7E+5<br>(4.5E+5)               | 1.5E+5 <sup>b2</sup><br>(4.0E+5) | 1.8E+5 <sup>3</sup><br>(2.5E+5)       | 5.1E+5 <sup>†‡*</sup><br>(7.0E+5)  | 4.5E+5*<br>(5.5E+5)                         | 4.5E+5<br>(7.6E+5)               | 4.05E+5<br>(4.5E+5)              | 5.0E+5<br>(4.6E+5)                    | 3.2E+5<br>(4.4E+5)                | 3.0E+5<br>(3.5E+5)                         | 3.1E+5<br>(4.1E+5)               | 3.0E+5<br>(4.6E+5)              | 3.1E+5<br>(1.9E+5)                   | 1.5E+5+ <sup>§</sup><br>(-2.3E+5)  | 8.2E+4^<br>(-1.2E+5)                           | 8.2E+4 <sup>1a</sup><br>(-1.2E+5) | 7.7E+4 <sup>2</sup><br>(-9.5E+4)  | 8.6E+4 <sup>3</sup><br>(-1.4E+5)        |
| Polysorbate-80                           | 3.8E+5 <sup>†‡</sup><br>(3.1E+5) | 2.6E+5<br>(3.8E+5) | 7.3E+3 <sup>§</sup>              | 2.7E+5+<br>(4.3E+5)               | 1.6E+5^<br>(2.7E+5)                      | 2.0E+5 <sup>a1</sup><br>(3.2E+5) | 1.5E+5 <sup>b2</sup><br>(2.5E+5) | 1.4E+5 <sup>3</sup><br>(2.0E+5)       | 4.2E+5+*<br>(3.9E+5)               | 3.1E+5*^<br>(2.5E+5)                        | 3.4E+5 <sup>a1</sup><br>(3.4E+5) | 2.8E+5 <sup>b2</sup><br>(2.1E+5) | 2.9E+5 <sup>3c</sup><br>(4.0E+5)      | 2.7E+5<br>(4.2E+5)                | 2.5E+5<br>(3.1E+5)                         | 2.3E+5<br>(3.4E+5)               | 2.3E+5 <sup>b</sup><br>(3.1E+5) | 2.8E+5<br>(2.3E+5)                   | 8.4E+4 <sup>§</sup><br>(-1.4E+5)   | 7.1E+4<br>(-8.1E+4)                            | 6.2E+4 <sup>1a</sup><br>(-8.5E+4) | 6.5E+4<br>(-5.2E+4)               | 7.6E+4<br>(-9.6E+4)                     |
| Saccharin                                | 3.6E+4 <sup>†‡</sup><br>(5.0E+4) | 1.3E+4<br>(2.0E+4) | 2.8E+3 <sup>§</sup><br>(-3.8E+3) | 1.7E+4+<br>(3.2E+4)               | 7.6E+3^<br>(2.2E+4)                      | 1.1E+4<br>(4.0E+4)               | 6.7E+4 <sup>b2</sup><br>(1.4E+4) | 5.0E+3 <sup>3</sup><br>(1.1E+4)       | 3.5E+4 <sup>†‡*</sup><br>(4.7E+4)  | 3.7E+4*<br>(5.0E+4)                         | 4.3E+4<br>(4.9E+4)               | 2.2+4 <sup>2b</sup><br>(5.6E+4)  | 2.3E+4<br>(4.6E+4)                    | 1.7E+4+<br>(2.3E+4)               | 1.0E+4^<br>(1.3E+4)                        | 9.9E+3 <sup>1</sup><br>(1.5E+4)  | 8.1E+3 <sup>b</sup><br>(1.1E+4) | 1.1+4<br>(9.5E+3)                    | 2.9E+3 <sup>§</sup><br>(-5.6E+3)   | 2.8E+3<br>(-3.0E+3)                            | 2.5E+3<br>(-3.0E+3)               | 3.8E+3<br>(-3.5E+3)               | 2.5E+3(-<br>3.0E+3)                     |
| Sucralose                                | 6.0E+4 <sup>†‡</sup><br>(8.5E+4) | 1.9E+4<br>(2.8E+4) | 4.3E+3 <sup>§</sup><br>(-7.5E+3) | 2.3E+4+<br>(5.3E+4)               | 1.2E+4^<br>(3.7E+4)                      | 1.8E+4*<br>(5.8E+4)              | 1.4E+4 <sup>b2</sup><br>(3.3E+4) | 9.0E+3 <sup>3</sup><br>(2.0E+4)       | 5.8E+4 <sup>†‡*</sup><br>(9.2E+4)  | 6.1E+4*<br>(7.3E+4)                         | 6.9E+4<br>(9.4E+5)               | 4.6E+4 <sup>2</sup><br>(8.2E+4)  | 4.2E+4<br>(6.3E+4)                    | 2.4E+4+<br>(3.6E+4)               | 1.2E+4^<br>(2.3E+4)                        | 1.0E+4 <sup>1</sup><br>(2.5E+4)  | 6.6E+3 <sup>b</sup><br>(2.1E+4) | 1.6+4<br>(1.7E+4)                    | 4.3E+3+ <sup>§</sup><br>(-7.4E+3)  | 4.4E+3<br>(-7.6E+3)                            | 3.3E+3<br>(-4.6E+3)               | 8.5E+3<br>(-1.4E+4)               | 3.9E+3(-<br>7.1E+3)                     |
| Sulphites                                | 2.0E+4 <sup>†‡</sup><br>(3.4E+4) | 2.9E+3<br>(4.3E+3) | 1.9E+3 <sup>§</sup><br>(2.2E+3)  | 4.0E+3+<br>(1.4E+4)               | 3.1E+3^<br>(1.1E+4)                      | 3.3E+3*<br>(2.1E+4)              | 3.7E+3<br>(9.9E+3)               | 2.7E+3 <sup>3</sup><br>(6.1E+3)       | 1.9E+4 <sup>†‡*</sup><br>(2.8E+4)  | 2.1E+4*<br>(4.1E+4)                         | 2.4E+4<br>(6.8E4)                | 2.0E+4 <sup>2</sup><br>(3.7E+4)  | 1.7E+4<br>(3.3E+4)                    | 3.4E+3+ <sup>a§</sup><br>(6.2E+3) | 2.1E+3<br>(3.5E+4)                         | 1.8E+3<br>(2.7E+3)               | 1.5E+3<br>(2.8E+3)              | 3.1E+3<br>(6.5E+3)                   | 1.8E+3+ <sup>§</sup><br>(-2.3E+3)  | 1.9E+3<br>(-2.2E+3)                            | 1.4E+3<br>(-1.8E+3)               | 2.6E+3 <sup>b</sup><br>(-6.2E+3)  | 1.9E+3<br>(-1.8E+3)                     |
| Titanium Dioxide                         | 1.9E+4 <sup>†</sup><br>(4.9E+4)  | 4.8E+3<br>(2.3E+4) | 3.1E+3<br>(2.4E+3)               | 8.2E+4+<br>(3.2E+4)               | 8.1E+2^<br>(1.4E+4)                      | .5E+3<br>(2.7E+4)                | 5.8E+2 <sup>b2</sup><br>(1.0E+4) | 2.2E+2 <sup>3</sup><br>(5.2E+3)       | 2.2E+4 <sup>†‡*</sup><br>(5.0E+4)  | 1.6E+4 <sup>**</sup><br>(4.2E+4)            | 1.8E+4<br>(3.7E+4)               | 1.2E+4 <sup>b2</sup><br>(2.2E+4) | 1.6E+4<br>(5.9E+4)                    | 8.8E+3+ <sup>§</sup><br>(2.8E+4)  | 1.4E+3^<br>(9.5E+4)                        | 1.5E+3 <sup>1</sup><br>(2.7E+4)  | 6.0E+2 <sup>b</sup><br>(8.1E+3) | 2.1E+3 <sup>c3</sup><br>(5.5E+3)     | 4.6E+1+ <sup>§</sup><br>(-1.4E+3)  | 2.0E+0^<br>(-1.6E+1)                           | 0.0E+0 <sup>1</sup><br>(-4.8E+1)  | 8.0E+0<br>(-1.6E+2)               | 4.4E+5 <sup>3</sup><br>(-1.3E+2)        |

Difference across regions OR difference across Crohn's Disease participants across regions:

† Australia different to Hong Kong

# Australia different to China

§ Hong Kong different to China

^ All non-Crohn's different to Crohn's (Mann-Whitney, unpaired)

+Difference between groups (Kruskal-Wallis, unpaired);

Post-Hoc (where +, is significant): <sup>1</sup> Household member different to Crohn's (unpaired); <sup>2</sup> Household member different to Crohn's (unpaired); <sup>3</sup> Unrelated control different to Crohn's (unpaired); <sup>3</sup> Unrelated controls different to Crohn's (Mann-Whitney, unpaired);

\*Household member different to Crohn's (paired); ^Household member different to Crohn's (Wilcoxon-Sign, paired); <sup>b</sup> First degree relative different to Crohn's (Wilcoxon, sign paired); <sup>c</sup> Unrelated control different to Crohn's (Mann-Whitney, unpaired)

**AUS – Australia, HK – Hong Kong, HHM – Healthy Household Members, FDR – First Degree Relatives**

**In Australia 17 FDRs were also analysed as Household members; In Hong Kong 35 FDRs were also analysed as Household members**

**Supplementary Table S5:** Median recent intake of additives calculated based on maximal permitted level of additives present in foods recorded in 3-day food diaries

|                                   | AUS<br>All<br>Subjects<br>(n=176) | HK<br>All<br>Subjects<br>(n=140) | All<br>Crohn's<br>Disease<br>Cases<br>(n=193) | All<br>Non-<br>Crohn's<br>Disease<br>Controls<br>(n=123) | All<br>Healthy<br>Household<br>Members<br>(n=84) | All<br>First<br>Degree<br>Relatives<br>(n=51) | All<br>Healthy<br>Unrelated<br>Controls<br>(n=40) | AUS<br>Crohn's<br>Disease<br>Cases<br>(n=99) | AUS<br>All Non-<br>Crohn's<br>Disease<br>Controls<br>(n=77) | AUS<br>Healthy<br>Household<br>Members<br>(n=49) | AUS<br>First<br>Degree<br>Relatives<br>(n=27) | AUS<br>Healthy<br>Unrelated<br>Controls<br>(n=18) | HK<br>Crohn's<br>Disease<br>Cases<br>(n=94) | HK<br>Non-Crohn's<br>Disease<br>Participant's<br>(n=46) | HK<br>Healthy<br>Household<br>Members<br>(n=35) | HK<br>First<br>Degree<br>Relatives<br>(n=24) | HK<br>Healthy<br>Unrelated<br>Controls<br>(n=22) |
|-----------------------------------|-----------------------------------|----------------------------------|-----------------------------------------------|----------------------------------------------------------|--------------------------------------------------|-----------------------------------------------|---------------------------------------------------|----------------------------------------------|-------------------------------------------------------------|--------------------------------------------------|-----------------------------------------------|---------------------------------------------------|---------------------------------------------|---------------------------------------------------------|-------------------------------------------------|----------------------------------------------|--------------------------------------------------|
| Total Additive Intake             | 17 (24) [0-93]                    | 0 (20) [0-98]                    | 0 (25) [0-98]                                 | 0 (19) [0-23]                                            | 0 (22) [0-93]                                    | 0 (18) <sup>2, b</sup> [0-56]                 | 0 (15) [0-57]                                     | 0 (27) [0-70]                                | 0 (21) [0-93]                                               | 0 (21) [0-93]                                    | 0 (20) [0-56]                                 | 0 (17) [0-39]                                     | 0 (19) [0-27]                               | 0 (15) [0-68]                                           | 0 (19) <sup>1a</sup> [2-69]                     | 0 (13) <sup>2</sup> [0-51]                   | 0 (21) [3-57]                                    |
| Total Artificial Sweetener Intake | 0 (0) [0-2295]                    | 0 (0) [0-9.55E3]                 | 0 (0) [0-2295]^                               | 0 (0) [0-9.55E3]                                         | 0 (4) <sup>1</sup> [0-540]                       | 0 (0) <sup>2</sup> [0-1575]                   | 0 (0) [0-9.55E3]                                  | 0 (0) [0-2295]                               | 0 (0) [0-1575]                                              | 0 (0) [0-540]                                    | 0 (0) [0-1575]                                | 0 (0) [0-517]                                     | 0 (0) [0-335]+                              | 0 (0) [0-9.55E3]                                        | 0 (4) [0-21] <sup>1a</sup>                      | 0 (0) <sup>2</sup> [0]                       | 0 (0) [0-9.55E3]                                 |
| Total Emulsifier Intake           | 0 (0) [0-6810]                    | 0 (0) [0-25005]                  | 0 (5) [0-25005]                               | 0 (79) [0-3960]                                          | 0 (3) [0-930]                                    | 0 (0) <sup>2</sup> [0-440]                    | 0 (87) [0-3960]                                   | 0 (18) [0-6810]                              | 0 (3) [0-960]                                               | 0 (34) [0-930]                                   | 0 (0) [0-444]                                 | 0 (240) [0-960]                                   | 0 (0) [0-25005]+                            | 0 (0) [0-3960]                                          | 0 (0) <sup>1a</sup> [0-230]                     | 0 (0) <sup>2</sup> [0]                       | 0 (75) [0-3960]                                  |
| Aluminosilicates                  | 0 (0) [0]                         | 0 (0) [0]                        | 0 (0) [0]                                     | 0 (0) [0]                                                | 0 (0) [0]                                        | 0 (0) [0]                                     | 0 (0) [0]                                         | 0 (0) [0]                                    | 0 (0) [0]                                                   | 0 (0) [0]                                        | 0 (0) [0]                                     | 0 (0) [0]                                         | 0 (0) [0]                                   | 0 (0) [0]                                               | 0 (0) [0]                                       | 0 (0) [0]                                    | 0 (0) [0]                                        |
| Aspartame                         | 0 (0) [0-765]***                  | 0 (0) [0-300]                    | 0 (0) [0-765]                                 | 0 (0) [0-525]                                            | 0 (0) [0-180]                                    | 0 (0) [0-526]                                 | 0 (0) [0-203]                                     | 0 (0) [0-765]**                              | 0 (0) [0-525]*                                              | 0 (0) [0-180]                                    | 0 (0) [0-525]                                 | 0 (0) [0-292]                                     | 0 (0) [0-300]                               | 0 (0) [0]                                               | 0 (0) [0]                                       | 0 (0) [0]                                    | 0 (0) [0]                                        |
| Carboxymethylcellulose            | 0(0) [0-5675]                     | 0 (0) [0-4950]                   | 0 (0) [0-5675]                                | 0 (0) [0-3300]                                           | 0 (0) [0-425]                                    | 0 (0) [0-370]                                 | 0 (5) [0-3300]                                    | 0 (0) [0-5675]                               | 0 (0) [0-800]                                               | 0 (0) [0-425]                                    | 0 (0) [0-370]                                 | 0 (0) [0-800]                                     | 0 (0) [0-4950]+                             | 0 (0) [0-3300]                                          | 0 (0) [0]                                       | 0 (0) [0]                                    | 0 (13) [0-3300]                                  |
| Carrageenan                       | 0 (0) [0-1135]                    | 0 (0) [0-1065]                   | 0(0) [0-1135]                                 | 0 (0) [0-960]                                            | 0 (4) <sup>1</sup> [0-230]                       | 0 (0) [0-350]                                 | 0 (0) [0-960]                                     | 0(0) [0-1135]                                | 0 (0) [0-960]                                               | 0 (0) [0-199]                                    | 0 (0) [0-350]                                 | 0 (0) [0-960]                                     | 0 (0) [0-10651]                             | 0 (0) [0-660]                                           | 0 (0) <sup>1</sup> [0-230]                      | 0 (0) <sup>2</sup> [0]                       | 0 (1) [0-660]                                    |
| Polysorbate-80                    | 0 (0) [0-1215]                    | 0 (0) [0 -25000]                 | 0 (0) [0-25000]                               | 0 (0) [0-930]                                            | 0 (0) [0-930]                                    | 0 (0) [0]                                     | 0 (0) [0]                                         | 0 (0) [0-1215]                               | 0 (0) [0-930]                                               | 0 (0) [0-930]                                    | 0 (0) [0]                                     | 0 (0) [0]                                         | 0 (0) [0-255000]                            | 0 (0) [0]                                               | 0 (0) [0]                                       | 0 (0) [0]                                    | 0 (0) [0]                                        |
| Saccharin                         | 0(0) [0]                          | 0 (0) [0-15]                     | 0 (0) [0-15]                                  | 0 (0) [0]                                                | 0 (0) [0]                                        | 0 (0) [0]                                     | 0 (0) [0]                                         | 0 (0) [0]                                    | 0 (0) [0]                                                   | 0 (0) [0]                                        | 0 (0) [0]                                     | 0 (0) [0]                                         | 0 (0) [0-15]                                | 0 (0) [0]                                               | 0 (0) [0]                                       | 0 (0) [0]                                    | 0 (0) [0]                                        |
| Sucralose                         | 0.0 (0) [0-149]                   | 0 (0) [0-9.55E3]                 | 0 (0) [0-142]                                 | 0 (0) [0-9.55E3]                                         | 0 (0) [0]                                        | 0 (0) [0]                                     | 0 (0) [0-9.55E3]                                  | 0 (0) [0-142]                                | 0 (0) [0-18]                                                | 0 (0) [0]                                        | 0 (0) [0]                                     | 0 (0) [0-15]                                      | 0 (0) [0-15]                                | 0 (0) [0-9.55E3]                                        | 0 (0) [0]                                       | 0 (0) [0]                                    | 0 (0) [0-9.55E3]                                 |
| Sulphites                         | 0 (0) [0-320]                     | 0 (0) [0-20]                     | 0 (0) [0-320]                                 | 0 (0) [0-75]                                             | 0 (0) [0-13]                                     | 0 (0) [0-20]                                  | 0 (5) [0-14]                                      | 0 (0) [0-2295]                               | 0 (0) [0-75]                                                | 0 (0) [0-13]                                     | 0 (0) [0-4]                                   | 0 (0) [0-75]                                      | 0 (0) [0-20]                                | 0 (0) [0-20]                                            | 0 (0) [0]                                       | 0 (5) [0-20]                                 | 0 (0) [0-20]                                     |
| Titanium Dioxide                  | 0 (0) [0-627]*                    | 0 (0) [0-400]                    | 0 (0) [0-672]                                 | 0 (0) [0-600]                                            | 0 (0) [0-102]                                    | 0 (0) [0-240]                                 | 0 (0) [0-600]                                     | 0 (0) [0-672]                                | 0 (0) [0-600]                                               | 0 (0) [0-192]                                    | 0 (0) [0-240]                                 | 0 (0) [0-600]                                     | 0 (0) [0-400]                               | 0 (0) [0]                                               | 0 (0) [0]                                       | 0 (0) [0]                                    | 0 (0) [0]                                        |

\*Difference between countries (P<0.05);  
\*\* Difference between countries (P<0.001);  
^ All non-Crohn's different to Crohn's (Mann-Whitney, unpaired);  
+Difference between groups (Kruskal-Wallis, unpaired); Post-Hoc (where +, is significant);  
<sup>1</sup> Household member different to Crohn's (unpaired); <sup>2</sup> Household member different to Crohn's (unpaired); <sup>3</sup> Unrelated control different to Crohn's (unpaired); <sup>3</sup> Unrelated controls different to Crohn's (Mann-Whitney, unpaired);  
<sup>a</sup> Household member different to Crohn's (paired); <sup>a</sup> Household member different to Crohn's (Wilcoxon-Sign, paired); <sup>b</sup> First degree relative different to Crohn's (Wilcoxon, sign paired); <sup>c</sup> Unrelated control different to Crohn's (Mann-Whitney, unpaired)

**AUS – Australia, HK – Hong Kong**  
**In Australia 17 FDRs were also analysed as Household members; In Hong Kong 35 FDRs were also analysed as Household members**



| Supplementary Table S6: Median Recent Intake of Energy, Nutrients and Alcohol, Estimated Based on Foods Recorded in 3-Day Food Diaries |                                   |                                  |                                            |                                                          |                                                  |                                               |                                                   |                                              |                                                             |                                                  |                                               |                                                   |                                             |                                                         |                                                 |                                              |                                                  |
|----------------------------------------------------------------------------------------------------------------------------------------|-----------------------------------|----------------------------------|--------------------------------------------|----------------------------------------------------------|--------------------------------------------------|-----------------------------------------------|---------------------------------------------------|----------------------------------------------|-------------------------------------------------------------|--------------------------------------------------|-----------------------------------------------|---------------------------------------------------|---------------------------------------------|---------------------------------------------------------|-------------------------------------------------|----------------------------------------------|--------------------------------------------------|
| Nutrient<br>Median (IQR)                                                                                                               | AUS<br>All<br>Subjects<br>(n=178) | HK<br>All<br>Subjects<br>(n=154) | All Crohn's<br>Disease<br>Cases<br>(n=193) | All<br>Non-<br>Crohn's<br>Disease<br>Controls<br>(n=139) | All<br>Healthy<br>Household<br>Members<br>(n=84) | All<br>First<br>Degree<br>Relatives<br>(n=51) | All<br>Healthy<br>Unrelated<br>Controls<br>(n=40) | AUS<br>Crohn's<br>Disease<br>Cases<br>(n=99) | AUS<br>All Non-<br>Crohn's<br>Disease<br>Controls<br>(n=79) | AUS<br>Healthy<br>Household<br>Members<br>(n=49) | AUS<br>First<br>Degree<br>Relatives<br>(n=27) | AUS<br>Healthy<br>Unrelated<br>Controls<br>(n=18) | HK<br>Crohn's<br>Disease<br>Cases<br>(n=94) | HK<br>Non-Crohn's<br>Disease<br>Participant's<br>(n=60) | HK<br>Healthy<br>Household<br>Members<br>(n=35) | HK<br>First<br>Degree<br>Relatives<br>(n=24) | HK<br>Healthy<br>Unrelated<br>Controls<br>(n=22) |
| DII                                                                                                                                    | 0.2152*<br>(2.34)                 | 2.6308<br>(1.75)                 | 1.4435<br>(3.12)                           | 0.7582 ^<br>(3.04)                                       | 0.5576 <sup>1</sup><br>(2.47)                    | 0.5626 <sup>2,b</sup><br>(-0.171)             | 1.4479<br>(3.49)                                  | -0.0659<br>(2.22)                            | -0.3421<br>(2.26)                                           | -0.2322<br>(2.28)                                | -0.7625 <sup>2</sup><br>(2.21)                | -0.4541<br>(2.44)                                 | 2.7051<br>(1.56)                            | 2.3441<br>(1.96)                                        | 2.2204 <sup>1,a</sup><br>(2.10)                 | 2.2828 <sup>2,b</sup><br>(1.98)              | 2.6952<br>(2.40)                                 |
| Energy (kJ)                                                                                                                            | 9212.2**<br>(3209.9)              | 7950.7<br>(2545.4)               | 8667.6<br>(3382.8)                         | 8553.8<br>(3394.4)                                       | 9334.7<br>(3357.7)                               | 8091.32<br>(3164.4)                           | 8056.1<br>(2689.8)                                | 9429.3**<br>(3321.1)                         | 9111.6**<br>(3372.6)                                        | 9632.5<br>(2832.1)                               | 8553.8<br>(2405.6)                            | 8940.7<br>(2664.7)                                | 8162.0<br>(2566.5)                          | 7705.0<br>(2579.4)                                      | 8513.7<br>(4414.1)                              | 7496.8 <sup>2</sup><br>(3003.6)              | 7913.9<br>(2367.3)                               |
| Protein (g)                                                                                                                            | 96.5<br>(36.8)                    | 90.4<br>(43.4)                   | 94.4<br>(42.2)                             | 95.4<br>(33.7)                                           | 98.2<br>(31.9)                                   | 91.8<br>(39.6)                                | 84.7<br>(34.8)                                    | 96.5<br>(40.7)                               | 96.5<br>(33.0)                                              | 96.3<br>(23.0)                                   | 97.1<br>(36.5)                                | 90.5<br>(35.0)                                    | 90.6<br>(44.3)                              | 89.1<br>(43.5)                                          | 107.7<br>(69.6)                                 | 90.5<br>(33.2)                               | 82.9<br>(37.9)                                   |
| Total fat (g)                                                                                                                          | 91.6 **<br>(40.9)                 | 70.4<br>(28.8)                   | 78.3 +<br>(36.8)                           | 81.2<br>(39.8)                                           | 97.6<br>(36.4)                                   | 70.5<br>(41.9)                                | 73.8<br>(25.8)                                    | 89.7**<br>(42.1)                             | 94.0**<br>(40.9)                                            | 100.3<br>(24.9)                                  | 81.7<br>(44.5)                                | 88.3<br>(35.6)                                    | 71.3<br>(29.5)                              | 68.0<br>(29.3)                                          | 77.7<br>(65.2)                                  | 54.8<br>(36.7)                               | 71.2<br>(8.5)                                    |
| Saturated fat (g)                                                                                                                      | 33.0**<br>(17.7)                  |                                  |                                            |                                                          |                                                  |                                               |                                                   | 32.7**<br>(20.3)                             | 33.1**<br>(15.7)                                            | 36.9<br>(13.7)                                   | 26.2<br>(22.1)                                | 32.0<br>(17.0)                                    |                                             |                                                         |                                                 |                                              |                                                  |
| Polyunsaturated fat (g)                                                                                                                | 14.0**<br>(8.3)                   |                                  |                                            |                                                          |                                                  |                                               |                                                   | 14.0**<br>(8.9)                              | 14.3**<br>(7.7)                                             | 14.5<br>(6.6)                                    | 14.1<br>(9.4)                                 | 13.3<br>(8.4)                                     |                                             |                                                         |                                                 |                                              |                                                  |
| Monounsaturated fat (g)                                                                                                                | 35.3**<br>(18.3)                  |                                  |                                            |                                                          |                                                  |                                               |                                                   | 34.4**<br>(17.9)                             | 35.8**<br>(16.5)                                            | 36.8<br>(17.0)                                   | 33.2<br>(19.0)                                | 32.7<br>(15.5)                                    |                                             |                                                         |                                                 |                                              |                                                  |
| Carbohydrate (g)                                                                                                                       | 222.7<br>(87.9)                   | 223.5<br>(89.2)                  | 225.7<br>(87.7)                            | 219.2<br>(88.1)                                          | 222.0<br>(99.4)                                  | 213.8 <sup>b</sup><br>(92.6)                  | 219.7<br>(67.3)                                   | 225.7<br>(94.7)                              | 219.8<br>(86.1)                                             | 222.9<br>(88.8)                                  | 223.8<br>(90.4)                               | 211.3<br>(61.6)                                   | 225.9<br>(80.5)                             | 217.9<br>(100.7)                                        | 236.3<br>(133.0)                                | 213.5<br>(99.9)                              | 231.6<br>(105.9)                                 |
| Sugars (g)                                                                                                                             | 77.2**<br>(53.0)                  | 45.0<br>(37.6)                   | 58.7<br>(46.5)                             | 64.4<br>(54.7)                                           | 84.4<br>(75.7)                                   | 56.9<br>(54.2)                                | 62.8<br>(47.2)                                    | 76.5**<br>(55.3)                             | 77.8**<br>(47.4)                                            | 88.1<br>(58.7)                                   | 71.1<br>(51.8)                                | 77.3<br>(33.9)                                    | 45.9<br>(37.7)                              | 45.3<br>(38.9)                                          | 57.2<br>(108.2)                                 | 44.6<br>(28.7)                               | 49.6<br>(49.2)                                   |
| Alcohol (g)                                                                                                                            | 0.04**<br>(11.3)                  | 0.0<br>(0.0)                     | 0.0<br>(1.34)                              | 0.0<br>(3.9)                                             | 0.0*<br>(14.4)                                   | 0.0<br>(0.1)                                  | 0.0<br>(2.0)                                      | 0.03**<br>(10.9)                             | 0.04**<br>(13.4)                                            | 1.7<br>(20.0)                                    | 0.1<br>(0.7)                                  | 0.5<br>(27.8)                                     | 0.0<br>(0.0)                                | 0.0<br>(0.0)                                            | 0.0<br>(0.0)                                    | 0.0<br>(0.0)                                 | 0.0<br>(0.0)                                     |
| Dietary fibre (g)                                                                                                                      | 22.9**<br>(13.0)                  | 11.0<br>(7.0)                    | 15.0+<br>(12.8)                            | 20.1 ^<br>(13.9)                                         | 21.3 <sup>1</sup><br>(14.4)                      | 19.0 <sup>2, b</sup><br>(13.7)                | 16.4<br>(15.3)                                    | 21.9<br>(13.9)                               | 25.3**<br>(13.8)                                            | 23.6<br>(16.1)                                   | 26.2 <sup>b</sup><br>(14.9)                   | 26.6<br>(13.1)                                    | 10.3<br>(6.6)+                              | 12.1 ^<br>(9.5)                                         | 9.3 <sup>a</sup><br>(14.5)                      | 13.0 <sup>2</sup><br>(7.4)                   | 12.5 <sup>3c</sup><br>(9.1)                      |
| Vitamin B12 (ug)                                                                                                                       | 4.1**<br>(3.1)                    | 2.1<br>(5.0)                     | 3.7+<br>(4.5)                              | 3.4<br>(3.2)                                             | 4.3<br>(3.5)                                     | 3.0<br>(2.9)                                  | 2.5<br>(2.6)                                      | 4.1**<br>(3.0)                               | 4.2**<br>(2.5)                                              | 4.3<br>(2.7)                                     | 3.6<br>(2.7)                                  | 3.9<br>(3.1)                                      | 2.1<br>(2.6)                                | 2.2<br>(6.7)                                            | 3.4<br>(5.5)                                    | 2.3<br>(2.9)                                 | 1.6<br>(1.2)                                     |
| Total folate (mg)                                                                                                                      | 510.5***<br>(246.8)               | 115.0<br>(102.0)                 | 288.2+<br>(424.2)                          | 423.1 ^<br>(424.9)                                       | 487.2 <sup>1</sup><br>(386.8)                    | 378.5<br>(437.7)                              | 285.7<br>(395.9)                                  | 497.7**<br>(285.3)                           | 536.9**<br>(221.4)                                          | 544.7<br>(327.8)                                 | 550.1<br>(202.4)                              | 479.5<br>(140.7)                                  | 128.9<br>(106.9)                            | 69.6<br>(109.7)                                         | 123.2<br>(72.0)                                 | 154.9<br>(89.9)                              | 105.9<br>(83.1)                                  |
| Sodium (mg)                                                                                                                            | 2580.3<br>(1433.1)                | 2931.36<br>(1252.1)              | 2974.0+<br>(1567.2)                        | 2548.0 ^<br>(1160.0)                                     | 2639.6 <sup>1a</sup><br>(949.1)                  | 2484.2 <sup>2b</sup><br>(1463.6)              | 2595.4<br>(1090.5)                                | 2723.2**<br>(1491.8)                         | 2543.5<br>(1224.8)                                          | 2663.6<br>(1070.9)                               | 2453.2<br>(1696.5)                            | 2353.9<br>(931.5)                                 | 2672.9<br>(1129.)+                          | 3152.5 ^<br>(1333.0)                                    | 2319.9 <sup>1a</sup><br>(971.2)                 | 2605.1 <sup>2b</sup><br>(1530.9)             | 2878.1<br>(699.5)                                |
| Calcium (mg)                                                                                                                           | 824.0**<br>(427.8)                | 480.0<br>(333.0)                 | 641.4<br>(564.2)                           | 662.2<br>(507)                                           | 820.9<br>(657.1)                                 | 618.0<br>(440.1)                              | 593.9<br>(516.6)                                  | 782.7**<br>(480.3)                           | 848.4**<br>(430.6)                                          | 929.0<br>(586.3)                                 | 734.4<br>(388.1)                              | 825.2<br>(30.5.2)                                 | 453.2<br>(311.3)                            | 480.3<br>(431.7)                                        | 366.8<br>(191.9)                                | 514.5<br>(470.8)                             | 433.2<br>(279.1)                                 |
| Iron (mg)                                                                                                                              | 11.3**<br>(4.9)                   | 8.4<br>(5.5)                     | 10.1<br>(5.9)                              | 10.5<br>(5.6)                                            | 12.0 <sup>1a</sup><br>(5.4)                      | 10.6<br>(4.7)                                 | 9.1<br>(4.8)                                      | 11.2**<br>(5.2)                              | 11.4**<br>(4.7)                                             | 12.1<br>(5.3)                                    | 11.3<br>(2.7)                                 | 10.1<br>(4.7)                                     | 9.1<br>(6.3)                                | 8.0<br>(5.5)                                            | 12.0<br>(7.9)                                   | 9.6<br>(7.6)                                 | 7.6<br>(5.1)                                     |

\*Difference between countries (P<0.05);

\*\* Difference between countries (P<0.001);

^ All non-Crohn's different to Crohn's (Mann-Whitney, unpaired);

+Difference between groups (Kruskal-Wallis, unpaired);

Post-Hoc (where +, is significant): <sup>1</sup> Household member different to Crohn's (unpaired); <sup>2</sup> Household member different to Crohn's (unpaired); <sup>3</sup> Unrelated control different to Crohn's (unpaired); <sup>3</sup> Unrelated controls different to Crohn's(Mann-Whitney, unpaired);

<sup>a</sup> Household member different to Crohn's (paired); <sup>a</sup> Household member different to Crohn's (Wilcoxon-Sign, paired); <sup>b</sup> First degree relative different to Crohn's (Wilcoxon, sign paired); <sup>c</sup> Unrelated control different to Crohn's (Mann-Whitney, unpaired)

**Supplementary Table S7.** Association Between DII, Additives, Nutrients (based on 3-day food diaries), and Crohn's disease Activity Index (CDAI), C-Reactive Protein (CRP) and Hemoglobin (Hb) in Australia and Hong Kong Crohn's disease Patients

|                                    | All             |                |               | Australia      |               |              | Hong Kong      |            |              |
|------------------------------------|-----------------|----------------|---------------|----------------|---------------|--------------|----------------|------------|--------------|
|                                    | CDAI<br>(n=193) | CRP<br>(n=191) | Hb<br>(n=193) | CDAI<br>(n=94) | CRP<br>(n=94) | Hb<br>(n=94) | CDAI<br>(n=99) | CRP (n=97) | Hb<br>(n=99) |
| <b>DII</b>                         | 0.12            | 0.24**         | -0.18         | 0.11           | -0.17         | 0.03         | -0.14          | 0.01       | -0.00        |
| <b>Total Additives</b>             | 0.00            | 0.00           | -0.18*        | 0.03           | -0.06         | -0.35**      | -0.06          | 0.19       | 0.02         |
| <b>Total Artificial Sweeteners</b> | 0.04            | 0.01           | -0.08         | 0.06           | -0.08         | -0.14        | 0.04           | -0.04      | -0.03        |
| <b>Total Emulsifier Intake</b>     | 0.01            | -0.11          | -0.08         | -0.01          | -0.18         | -0.12        | -0.00          | -0.00      | -0.01        |
| Aluminosilicates                   | NA              | NA             | NA            | NA             | NA            | NA           | NA             | 0.05       | -0.05        |
| Aspartame                          | 0.02            | -0.04          | -0.07         | 0.06           | -0.03         | -0.15        | 0.04           | 0.10       | 0.02         |
| Carboxymethylcellulose             | 0.01            | -0.14          | -0.03         | 0.02           | -0.11         | -0.07        | 0.01           | 0.01       | 0.10         |
| Carrageenan                        | -0.01           | -0.09          | -0.09         | 0.00           | -0.07         | 0.00         | -0.05          | -0.14      | 0.09         |
| Polysorbate-80                     | -0.09           | -0.04          | 0.06          | -0.15          | -0.13         | -0.08        | 0.04           | 0.12       | -0.01        |
| Saccharin                          | -0.08           | 0.03           | 0.05          | NA             | -0.00         | NA           | -0.14          | 0.13       | 0.07         |
| Sucralose                          | -0.09           | -0.00          | -0.03         | -0.14          | -0.03         | -0.12        | -0.04          | 0.21       | <b>-0.03</b> |
| Sulphites                          | -0.14           | -0.19*         | 0.01          | -0.10          | -0.04         | -0.15        | 0.00           | 0.02       | 0.03         |
| Titanium Dioxide                   | -0.08           | -0.01          | -0.04         | -0.08          | -0.15         | -0.11        | 0.03           | -0.04      | 0.14         |
| <b>Nutrients</b>                   |                 |                |               |                |               |              |                |            |              |
| Energy                             | -0.14           | -0.09          | 0.16*         | -0.09          | -0.06         | 0.10         | -0.105         | 0.01       | 0.20         |
| Protein                            | 0.01            | -0.00          | 0.16*         | 0.14           | 0.02          | 0.04         | -0.16          | -0.06      | 0.27**       |
| Total fat                          | -0.15*          | -0.18*         | 0.13          | -0.12          | -0.06         | -0.02        | -0.07          | -0.07      | 0.24*        |
| Saturated fat                      | NA              | NA             | NA            | -0.03          | -0.03         | 0.02         | NA             | NA         | NA           |
| PUFAS                              | NA              | NA             | NA            | -0.16          | 0.01          | 0.04         | NA             | NA         | NA           |
| MUFAS                              | NA              | NA             | NA            | -0.08          | -0.01         | -0.07        | NA             | NA         | NA           |
| Carbohydrate                       | -0.12           | -0.08          | 0.18*         | -0.11          | -0.10         | 0.17         | -0.11          | -0.03      | 0.20         |
| Sugars                             | -0.06           | -0.17*         | 0.12          | 0.14           | 0.05          | 0.06         | -0.08          | -0.09      | 0.06         |
| Alcohol                            | -0.17*          | -0.13          | 0.09          | -0.16          | 0.01          | 0.07         | 0.07           | 0.09       | -0.02        |
| Dietary Fibre                      | -0.22*          | -0.26**        | 0.21**        | -0.04          | -0.03         | 0.08         | -0.17          | -0.06      | 0.21*        |
| Iron                               | -0.04           | -0.06          | 0.20**        | 0.10           | 0.00          | 0.12         | -0.62          | 0.05       | 0.23*        |

\*Significant at P <0.05

| Supplementary Table S8. Correlation between energy-adjusted DII and current, total additive intake (mg/per kg body weight) |              |              |                     |                              |           |                        |         |                           |                                  |                   |                        |                    |                          |                                   |                   |        |                      |
|----------------------------------------------------------------------------------------------------------------------------|--------------|--------------|---------------------|------------------------------|-----------|------------------------|---------|---------------------------|----------------------------------|-------------------|------------------------|--------------------|--------------------------|-----------------------------------|-------------------|--------|----------------------|
| Whole cohort                                                                                                               | AUS          | HK           | All Crohn's Disease | All                          | All       | All                    | All     | AUS Crohn's Disease Cases | AUS                              | AUS Healthy       | AUS                    | AUS Healthy        | HK Crohn's Disease Cases | HK                                | HK Healthy        | HK     | HK Healthy Unrelated |
|                                                                                                                            | All Subjects | All Subjects | Cases               | Non-Crohn's Disease Controls | Household | First Degree Relatives | Healthy | (n=99)                    | All Non-Crohn's Disease Controls | Household Members | First Degree Relatives | Unrelated Controls | (n=94)                   | Non-Crohn's Disease Participant's | Household Members | First  | Controls             |
| Total additive intake per kg body weight                                                                                   |              |              |                     |                              |           |                        |         |                           |                                  |                   |                        |                    |                          |                                   |                   |        |                      |
| Spearman's correlation coefficient                                                                                         | 0.145        | 0.170        | 0.191               | 0.198                        | 0.016     | -0.041                 | -0.212  | 0.255                     | 0.261                            | -0.028            | 0.123                  | -0.189             | -0.191                   | 0.221                             | 0.094             | -0.067 | -                    |
| P-value                                                                                                                    | 0.015        | 0.032        | 0.035               | 0.012                        | 0.864     | 0.737                  | 0.158   | 0.146                     | 0.013                            | 0.821             | 0.433                  | 0.355              | 0.513                    | 0.060                             | 0.515             | 0.739  | 0.435                |

-

**Supplementary Table S9.** Differences in Current (3 day) Intake of Energy, Nutrients, and Additives Between Crohn's disease Participants With Normal Versus Elevated CRP, and Normal Versus Low Haemoglobin (Hb)

|                                           | All                |                     | Australia          |                     | Hong Kong          |                     | All                |                    | Australia          |                      | Hong Kong          |                    |
|-------------------------------------------|--------------------|---------------------|--------------------|---------------------|--------------------|---------------------|--------------------|--------------------|--------------------|----------------------|--------------------|--------------------|
| Nutrient and Additive Intake Median (IQR) | CRP normal (n=135) | CRP elevated (n=56) | CRP normal (n=70)  | CRP elevated (n=24) | CRP normal (n=65)  | CRP elevated (n=32) | Hb normal (n=148)  | Hb low (n=45)      | Hb normal (n=75)   | Hb low (n=19)        | Hb normal (n=73)   | Hb low (n=26)      |
| Energy (kJ)                               | 8798.5<br>(3357.9) | 8433.5<br>(3309.4)  | 9429.7<br>(3886.3) | 8446.4<br>(10358.6) | 8162.0<br>(2397.7) | 8177.4<br>(4770.0)  | 8449.6<br>(3094.3) | 8752.3<br>(4124.9) | 9348.4<br>(3436.0) | 9994.5<br>( 12492.6) | 8162.0<br>(2589.7) | 7991.1<br>(3325.5) |
| Protein (g)                               | 94.4<br>(39.5)     | 93.0<br>(53.6)      | 95.9<br>(44.1)     | 92.7<br>(54.6)      | 91.4<br>(36.7)     | 93.0<br>(55.5)      | 94.2<br>(43.0)     | 97.1<br>(45.2)     | 92.5<br>( 43.0)    | 102.3<br>( 27.9)     | 94.4<br>(42.5)     | 84.0<br>(43.9)     |
| Total fat (g)                             | 78.75<br>(40.18)   | 77.7<br>(35.5)      | 89.6<br>(45.8)     | 90.4<br>(40.9)      | 70.5<br>(28.4)     | 72.4<br>(40.0)      | 78.0<br>(37.3)     | 79.0<br>(47.1)     | 89.2<br>( 47.0)    | 104.9<br>( 38.0)     | 73.1<br>(30.0)     | 69.7<br>( 28.4)    |
| Saturated fat (g)                         |                    |                     | 32.3<br>(22.0)     | 32.2<br>(18.2)      |                    |                     | 24.2<br>(17.9)     | 24.8<br>(17.0)     | 32.1<br>( 22.2)    | 33.9<br>( 15.7)      |                    |                    |
| Polyunsaturated fat (g)                   |                    |                     | 14.0<br>(9.4)      | 14.2<br>(8.0)       |                    |                     |                    |                    | 14.0<br>(8.7)      | 14.5<br>( 10.6)      |                    |                    |
| Monounsaturated fat (g)                   |                    |                     | 33.4<br>(18.3)     | 36.0<br>(20.4)      |                    |                     |                    |                    | 32.5<br>( 17.8)    | 37.7<br>( 15.8)      |                    |                    |
| Carbohydrate(g)                           | 230.2<br>(82.2)    | 209.5<br>(97.8)     | 229.7<br>(90.6)    | 212.2<br>(99.3)     | 230.2<br>(80.0)    | 207.7<br>(101.3)    | 226.1<br>( 87.4)   | 219.7<br>( 88.6)   | 225.6<br>( 93.1)   | 235.0<br>( 124.9)    | 228.4<br>(84.7)    | 213.4<br>(78.9)    |
| Sugars (g)                                | 60.2<br>(46.6)     | 52.0<br>(61.7)      | 77.7<br>(47.4)     | 64.6<br>(89.6)      | 46.0<br>(41.0)     | 45.3<br>(34.8)      | 60.3<br>(45.7)     | 52.0<br>(51.0)     | 76.6<br>( 58.2)    | 67.9<br>( 55.1)      | 46.3<br>(42.7)     | 44.3<br>(23.0)     |
| Alcohol (g)                               | 0.0<br>(0.4)       | 0.0<br>(4.4)        | 0.02<br>(10.9)     | 0.5<br>(16.3)       | 0.0<br>(0.0)       | 0.0<br>(0.0)        | 0.0<br>(40.7)      | 0.0<br>(0.5)       | 0.02<br>( 11.0)    | 0.1<br>( 5.2)        | 0.0<br>(0.0)       | 0.0<br>(0.0)       |
| Dietary Fibre (g)                         | 15.9<br>(12.5)     | 14.7<br>(13.4)      | 22.2<br>(14.0)     | 21.4<br>(13.0)      | 8.6<br>(5.5)       | 10.7<br>(5.6)       | 16.0<br>(12.2)     | 12.1<br>(43.8)     | 22.0<br>( 13.8)    | 24.9<br>( 20.8)      | 10.6<br>(6.4)      | 8.6<br>(5.5)       |
| Iron (mg)                                 | 10.1<br>(5.8)      | 9.8<br>(6.9)        | 11.0<br>(5.3)      | 11.2<br>(5.5)       | 7.9<br>(4.8)       | 8.9<br>(9.5)        | 10.2<br>(5.6)      | 8.8<br>(7.1)       | 11.1<br>( 5.0)     | 11.8<br>( 7.0)       | 8.6<br>(5.5)       | 7.2<br>( 4.6)      |
| Total Additive Intake                     | 30.0<br>(22.8)     | 52.0<br>(29.3)      | 17.5<br>(70.0)     | 17.0<br>(30.0)      | 17.0<br>(18.0)     | 20.0<br>(30.0)      | 4.0<br>(22.5)      | 3.0<br>(30.5)      | 17.0<br>(68.0)     | 15.0<br>(41.0)       | 17.0<br>(19.0)     | 17.0<br>(30.0)     |
| Total Artificial Sweetener Intake         | 720.0<br>(0.0)     | 0.0<br>(2.9)        | 0.0<br>(18.8)      | 0.0<br>(180.0)      | 0.0<br>(0.0)       | 0.0<br>(1.8)        | 0.0<br>(0.1)       | 0.0<br>(1.3)       | 0.0<br>(12.5)      | 0.0<br>(15.0)        | 0.0<br>(1.4)       | 0.0<br>(1.6)       |
| Total Emulsifier Intake                   | 0.0<br>(54.6)      | 0.0<br>(0.0)        | 0.0<br>(105.0)     | 0.0<br>(0.0)        | 0.0<br>(7.0)       | 0.0<br>(10.0)       | 0.0<br>(0.0)       | 0.0<br>(75.0)      | 0.0<br>(0.0)       | 0.0<br>(135.0)       | 0.0<br>(6.0)       | 0.0<br>(7.8)       |
| Acesulfame K                              | 480.0<br>(0.0)     | 0.0<br>(0.0)        | 0.0<br>(0.0)       | 0.0<br>(120.0)      | 0.0<br>(0.0)       | 0.0<br>(0.3)        | 0.0<br>(0.0)       | 0.0<br>(0.4)       | 0.0<br>(0.0)       | 0.0<br>(0.0)         | 0.0<br>(0.0)       | 0.0<br>(0.2)       |
| Aluminosilicate                           | 0.0<br>(0.0)       | 0.0<br>(0.0)        | 0.0<br>(0.0)       | 0.0<br>(0.0)        | 0.0<br>(0.0)       | 0.0<br>(0.0)        | 0.0<br>(0.0)       | 0.0<br>(0.0)       | 0.0<br>(0.0)       | 0.0<br>(0.0)         | 0.0<br>(0.0)       | 0.0<br>(0.0)       |
| Aspartame                                 | 240.0<br>(0.0)     | 0.0<br>(0.0)        | 0.0<br>(0.0)       | 0.0<br>(60.0)       | 0.0<br>(0.0)       | 0.0<br>(0.0)        | 0.0<br>(0.0)       | 0.0<br>(0.0)       | 0.0<br>(0.0)       | 0.0<br>(7.5)         | 0.0<br>(0.0)       | 0.0<br>(7.5)       |
| Carboxymethylcellulose                    | 0.0<br>(0.0)       | 0.0<br>(0.0)        | 0.0<br>(0.0)       | 0.0<br>(0.0)        | 0.0<br>(0.0)       | 0.0<br>(10.0)       | 0.0<br>(0.0)       | 0.0<br>(75.0)      | 0.0<br>(0.0)       | 0.0<br>(75.0)        | 0.0<br>(0.0)       | 0.0<br>(0.0)       |
| Carrageenan                               | 0.0<br>(0.3)       | 0.0<br>(0.0)        | 0.0<br>(17.5)      | 0.0<br>(0.0)        | 0.0<br>(0.0)       | 0.0<br>(160.0)      | 0.0<br>(0.0)       | 0.0<br>(37.5)      | 0.0<br>(0.0)       | 0.0<br>(37.5)        | 0.0<br>(0.0)       | 0.0<br>(0.8)       |
| Polysorbate-80                            | 0.0<br>(0.0)       | 0.0<br>(0.0)        | 0.0<br>(0.0)       | 0.0<br>(0.0)        | 0.0<br>(0.0)       | 0.0<br>(0.0)        | 0.0<br>(0.0)       | 0.0<br>(0.0)       | 0.0<br>(0.0)       | 0.0<br>(0.0)         | 0.0<br>(0.0)       | 0.0<br>(0.0)       |
| Saccharin                                 | 0.0<br>(0.0)       | 0.0<br>(0.0)        | 0.0<br>(0.0)       | 0.0<br>(180.0)      | 0.0<br>(0.0)       | 0.0<br>(0.0)        | 0.0<br>(0.0)       | 0.0<br>(0.0)       | 0.0<br>(0.0)       | 0.0<br>(0.0)         | 0.0<br>(0.0)       | 0.0<br>(0.0)       |
| Sucralose                                 | 0.0<br>(0.0)       | 0.0<br>(0.0)        | 0.0<br>(0.0)       | 0.0<br>(0.0)        | 0.0<br>(0.0)       | 0.0<br>(0.0)        | 0.0<br>(0.0)       | 0.0<br>(0.0)       | 0.0<br>(0.0)       | 0.0<br>(0.0)         | 0.0<br>(0.0)       | 0.0<br>(0.0)       |
| Sulphites                                 | 0.0<br>(0.0)       | 0.0<br>(0.0)        | 0.0<br>(320.0)     | 0.0<br>(0.0)        | 0.0<br>(0.0)       | 0.0<br>(0.0)        | 0.0<br>(0.6)       | 0.0<br>(1.0)       | 0.0<br>(0.6)       | 0.0<br>(1.0)         | 0.0<br>(0.0)       | 0.0<br>(0.0)       |
| Titanium Dioxide                          | 0.0<br>(0.0)       | 0.0<br>(0.0)        | 0.0<br>(0.0)       | 0.0<br>(0.0)        | 0.0<br>(0.0)       | 0.0<br>(0.0)        | 0.0<br>(0.0)       | 0.0<br>(0.0)       | 0.0<br>(0.0)       | 0.0<br>(0.0)         | 0.0<br>(0.0)       | 0.0<br>(0.0)       |
